# Supplementary material for: Tracing rate and extent of human induced hypoxia during the last 200 years in the mesotrophic lake Tiefer See (NE Germany)
Source: Copernicus journal article supplement (doi:10.5194/egusphere-2024-835), 2024-04-18
Supplement: Supplementary file 1 [file egusphere-2024-835-supplement.pdf]

**Tracing rate and extent of human induced hypoxia during the last 200 years in the mesotrophic lake Tiefer See (NE Germany)**

5 Ido Sirota<sup>1</sup>, Rik Tjallingii<sup>1</sup>, Sylvia Pinkerneil<sup>1</sup>, Birgit Schroeder<sup>1</sup>, Marlen Albert<sup>1</sup>, Rebecca Kearny<sup>1</sup>,  
Oliver Heiri<sup>2</sup>, Simona Breu<sup>2</sup> and Achim Brauer<sup>1,3</sup>

<sup>1</sup>Section Climate Dynamics and Landscape Evolution, GFZ German Research Centre for Geosciences, Potsdam, Germany

<sup>2</sup>Geoecology, Department of Environmental Sciences, University of Basel, Basel, Switzerland

<sup>3</sup>Institute of Geosciences, University of Potsdam, Potsdam, Germany

10 **Contents of this file**

Figures S1 to S2

Tables S1 to S2

**Introduction**

This file contains additional information to support the discussion and interpretation of the study.

15 **Figure S1 – varve counting and core correlation**

20 Varve counting and core correlation of all the cores used in this study. Each core is presented as an assemblage of thin sections images, covering the entire varved interval (Unit V). The orange dots mark that counted calcite layers, each dot represents one year. In addition, the marker layers that were determined on the TSK11-K1 master core, are marked on all of the cores with their ages. The year of the onset of varve preservation appears at the base of the varved unit in each core.

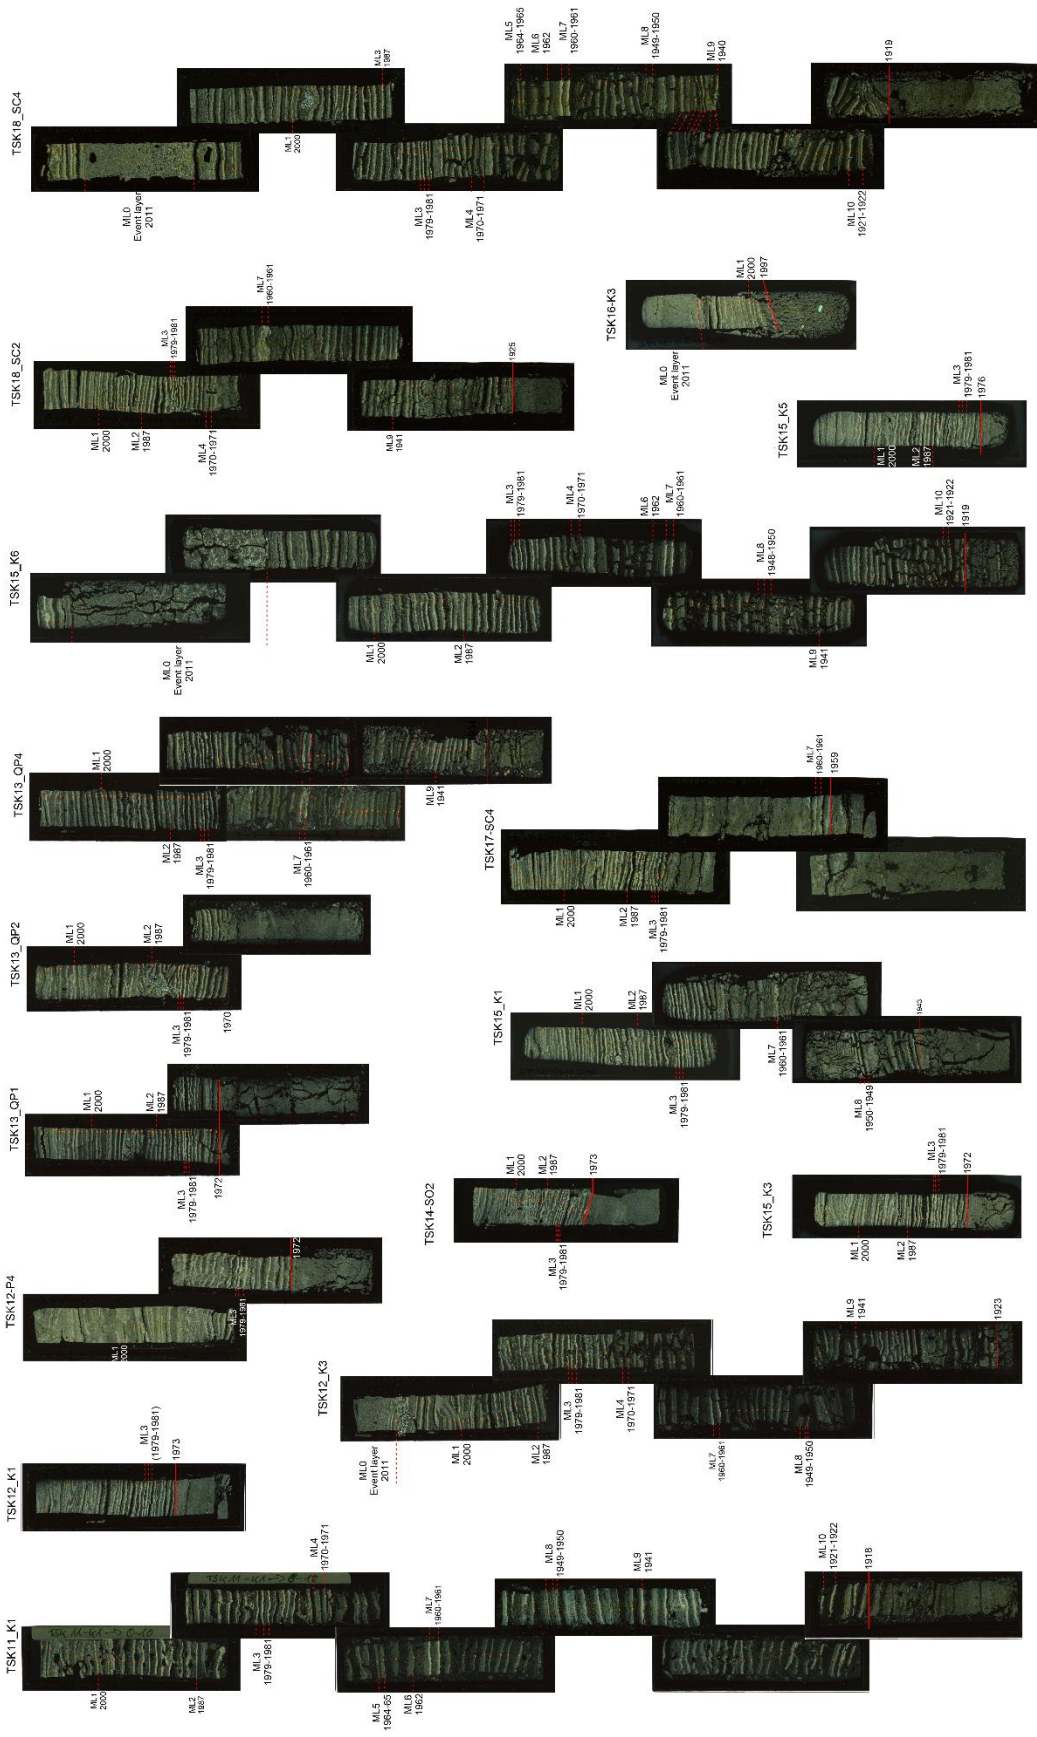

## Figure S2. TOC in sediment trap data

25 Total organic carbon (TOC) flux, content and  $\delta^{13}\text{C}_{\text{org}}$  of sediments from the hypolimnion of the lake are presented for the period of 2015-2021. Active sedimentation was monitored in order to identify the properties of the TOC in the lake. Sediment sampling is conducted at intervals of 15 days with an automated sequential trap (Technicap PPS 3/3; active area 0.125 m<sup>2</sup>) equipped with 12 sample bottles.

30 The sediments from the traps were freeze-dried and weighed to determine the dry deposition (i.e. sediment flux: g m<sup>-2</sup> d<sup>-1</sup>). Afterwards, the samples were ground and homogenized. Prior to determination of TOC, 0.2 mg sample aliquots were in situ decalcified in Ag capsules (20% HCl and drying at 75 °C), also in replicates. TOC was measured on in-situ calcified samples using a Carlo Erba NC-2500 elemental analyzer. All process and analytical measurements were done at the laboratories of section 4.3 of the GFZ Potsdam center of geosciences, Potsdam, Germany.

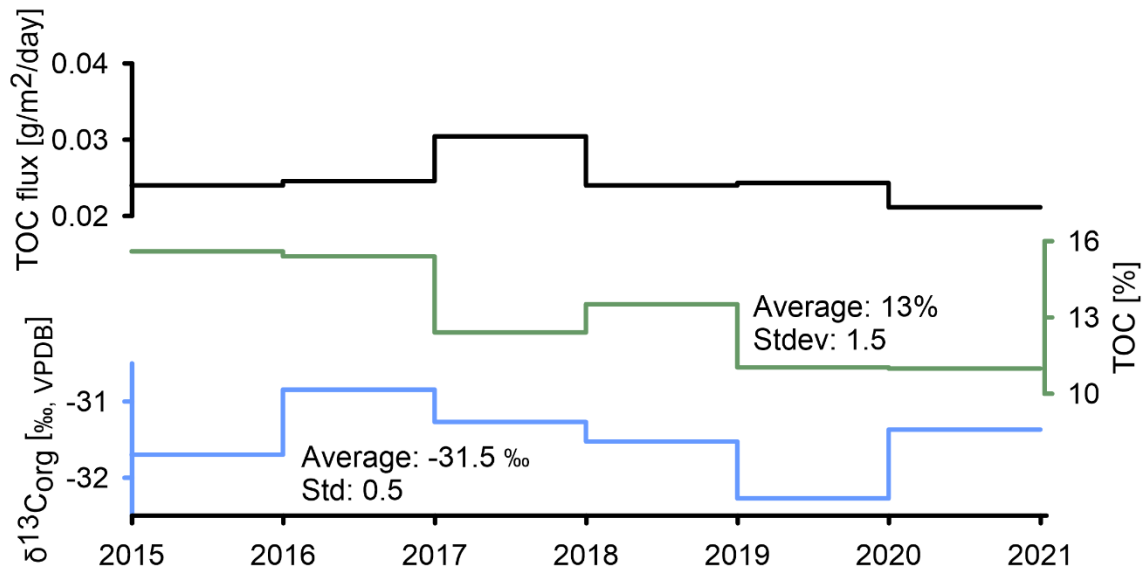

35

**Table S1.**

List of marker layers (ML) in cores TSK11-K1 and TSK18-SC4.

| #Marker layer | Description                                                 | Number of varves from the previous ML | Age (year CE) |
|---------------|-------------------------------------------------------------|---------------------------------------|---------------|
| ML0           | Mixed event layer                                           | Observed in TSK18-SC4                 | 2011          |
| ML1           | Clear calcite layer                                         | 10 (from the core top)                | 2000          |
| ML2           | Clear calcite layer                                         | 12                                    | 1987          |
| ML3           | Three distinct calcite layers                               | 5                                     | 1979-81       |
| ML4           | Two brown (OM) layers in between thick diatom layer         | 7                                     | 1970-71       |
| ML5           | A brown (OM) layer in between thick diatom layers           | 4                                     | 1964-65       |
| ML6           | A clear calcite layer with a brown layer (OM) on top        | 1                                     | 1962          |
| ML7           | Two of thick calcite layers                                 | 0                                     | 1960-61       |
| ML8           | Three brown layers (OM)                                     | 9                                     | 1949-50       |
| ML9           | A thick calcite layer with a brown layer in the varve below | 7                                     | 1941          |
| ML10          | Two thick calcite layers                                    | 18                                    | 1921-22       |
| Varves base   |                                                             | 3                                     | 1918          |

**Table S2.**

- 40 Chironomids counts in cores TSK15-K5 and TSK18-SC4 with division into identified chironomids species. See separate file.

|           | Sediment deę | Total Ind. | Trichoptera | Daphnia (e)         | Oribatida          | Plumatella          |
|-----------|--------------|------------|-------------|---------------------|--------------------|---------------------|
| TSK15-K5  | 2.5          | 42         |             | 8                   | 2                  | 2                   |
| TSK15-K5  | 4.5          | 67         | 1           | 13                  | 1                  | 2                   |
| TSK15-K5  | 7.5          | 64         |             | 10                  | 2                  |                     |
| TSK15-K5  | 10.5         | 85         | 3           | 8                   | 1                  | 3                   |
| TSK15-K5  | 17.5         | 75         | 2           | 14                  |                    |                     |
| TSK15-K5  | 26.5         | 89         | 1           | 6                   |                    | 1                   |
| TSK18-SC4 | 14           | 41         |             | 12                  |                    | 2                   |
| TSK18-SC4 | 29           | 47         | 1           | 17                  | 2                  | 1                   |
| TSK18-SC4 | 37           | 18         |             | 1                   |                    |                     |
| TSK18-SC4 | 47           | 30         | 1           | 14                  | 1                  |                     |
| TSK18-SC4 | 60           | 34         | 1           | 9                   |                    | 1                   |
| TSK18-SC4 | 76           | 39         | 1           | 1                   |                    | 1                   |
|           |              |            |             | <b>Glyptotendip</b> | <b>Labrundinia</b> | <b>Limnophies /</b> |
| TSK15-K5  | 2.5          |            |             | 1                   |                    |                     |
| TSK15-K5  | 4.5          |            |             | 3                   |                    | 1                   |
| TSK15-K5  | 7.5          |            |             | 1                   |                    |                     |
| TSK15-K5  | 10.5         |            |             | 2                   |                    | 1                   |
| TSK15-K5  | 17.5         |            |             | 1                   |                    | 2                   |
| TSK15-K5  | 26.5         |            |             |                     | 1                  | 2                   |
| TSK18-SC4 | 14           |            |             | 1                   |                    |                     |
| TSK18-SC4 | 29           |            |             |                     |                    |                     |
| TSK18-SC4 | 37           |            |             |                     |                    |                     |
| TSK18-SC4 | 47           |            |             |                     |                    | 1                   |
| TSK18-SC4 | 60           |            |             |                     |                    |                     |
| TSK18-SC4 | 76           |            |             | 2                   |                    | 2                   |

d

| Ceratopogoni | Ceriodaphnia | Ephemeropte | Cristatella m | Sialis       | Chaoborus    | Chironomida  |
|--------------|--------------|-------------|---------------|--------------|--------------|--------------|
|              |              |             | 3             | 1            | 2            | 24           |
| 2            |              |             | 3             |              |              | 44           |
| 3            | 2            |             | 3             |              |              | 44           |
| 2            | 1            |             | 3             |              | 1            | 63           |
|              | 2            |             | 2             | 1            | 1            | 53           |
| 1            | 4            |             | 1             |              | 1            | 74           |
|              | 1            |             | 1             |              | 1            | 24           |
|              |              |             | 1             |              |              | 25           |
|              |              |             |               |              |              | 17           |
|              |              |             |               |              |              | 14           |
|              | 1            |             | 1             |              |              | 21           |
|              | 1            |             | 1             |              |              | 34           |
| Micropsectra | Microtendipe | Monodiames  | Pagastiella   | Parachaetocl | Parachironon | Paracladopel |
|              | 5            |             |               |              |              |              |
|              | 4            |             |               |              | 2            |              |
|              | 2            |             |               |              | 3            |              |
| 13           | 10           |             |               |              |              |              |
| 10           | 4            |             |               | 1            |              |              |
| 37           |              |             |               |              |              | 1            |
|              | 6            |             | 1             |              |              |              |
| 1            | 1            |             |               |              |              | 1            |
| 1            |              |             |               |              |              |              |
| 2            |              |             |               |              |              |              |
| 5            | 1            |             |               |              |              |              |
| 3            | 1            |             |               |              | 1            | 1            |

| Sediment depth | Total ident. | Unidentified | Chironomini | Tanytarsini | Tanypodinae | Orthoclaadiinae |
|----------------|--------------|--------------|-------------|-------------|-------------|-----------------|
| 2.5            | 13           |              | 1           | 3           |             |                 |
| 4.5            | 14           |              |             | 1           | 1           |                 |
| 7.5            | 21           | 2            |             |             |             | 2               |
| 10.5           | 27           |              |             | 4           |             | 1               |
| 17.5           | 21           |              | 1           |             | 1           |                 |
| 26.5           | 12           |              | 1           | 1           |             |                 |
| 14             | 10           |              |             |             |             |                 |
| 29             | 15           |              |             | 1           | 1           | 1               |
| 37             | 8            |              |             | 1           |             |                 |
| 47             | 6            |              |             |             |             |                 |
| 60             | 6            |              |             | 1           |             | 1               |
| 76             | 15           |              |             |             | 1           | 1               |

|   | Paratanytarsi | Paratendipes | Phaenopsecti | Polypedilum | Procladius | Psectrocladius | Pseudochiron |
|---|---------------|--------------|--------------|-------------|------------|----------------|--------------|
| 1 |               |              |              | 1           |            |                |              |
| 2 |               |              |              | 5           |            | 3              |              |
| 3 | 1             |              | 1            | 3           |            | 3              |              |
| 2 |               |              |              | 3           |            | 1              |              |
| 3 |               |              |              | 1           |            | 1              | 1            |
| 2 |               |              |              |             |            | 1              | 1            |
| 1 |               |              | 1            | 1           |            | 2              |              |
| 4 |               |              |              | 2           |            |                |              |
| 3 | 1             |              |              | 1           |            |                |              |
|   |               |              | 1            |             | 1          | 1              |              |
| 3 | 1             |              |              |             |            | 1              |              |
| 2 |               |              |              | 1           |            |                | 1            |

**Ablabesmyia Chironomus a Chironomus j Cladopelma l Cladotanytar: Corynoneura Crycotopus c)**

|   |   |  |   |   |   |   |   |
|---|---|--|---|---|---|---|---|
| 1 |   |  |   |   | 1 | 4 | 2 |
| 1 |   |  |   |   | 2 | 3 | 1 |
| 2 |   |  | 1 |   | 3 | 3 | 3 |
| 1 | 7 |  |   |   | 1 | 2 | 6 |
| 5 | 4 |  |   | 2 | 1 |   | 3 |
| 1 | 2 |  |   | 3 |   | 1 |   |
| 1 |   |  | 2 |   | 2 | 2 | 2 |
| 1 | 1 |  | 1 | 1 |   | 3 | 1 |
| 2 |   |  |   |   | 1 |   | 3 |
| 2 |   |  |   |   |   | 1 |   |
| 2 |   |  |   |   |   | 2 |   |
| 3 | 1 |  | 1 | 1 | 1 | 3 |   |

**Sergentia cor Synorthoclad Tanytarsus ch Tanytarsus gl Tanytarsus lu Tanytarsus m Tanytarsus m**

|   |   |  |   |   |   |   |   |
|---|---|--|---|---|---|---|---|
| 1 |   |  |   |   |   | 2 |   |
|   | 1 |  | 2 |   |   | 3 | 1 |
|   |   |  |   |   |   |   | 1 |
| 2 |   |  |   |   |   | 2 |   |
| 1 |   |  |   | 1 |   | 5 |   |
| 3 |   |  | 1 | 1 | 1 | 7 |   |
|   |   |  |   |   |   | 1 |   |
|   |   |  |   |   |   |   | 2 |
|   |   |  |   | 1 |   | 1 |   |
| 1 |   |  |   | 1 | 1 | 1 |   |
| 1 |   |  | 1 |   |   | 2 |   |



**Crycotopus ir Dicrotendipe: Endochironor Einfeldia natchitocheae-type**

|   |   |   |   |
|---|---|---|---|
|   | 1 |   |   |
| 1 | 4 |   |   |
| 1 | 3 | 1 |   |
| 1 | 3 | 1 |   |
| 2 |   | 1 | 1 |
| 1 | 2 |   |   |
|   | 1 |   |   |
| 2 | 2 |   |   |
|   | 1 |   |   |
| 3 |   |   |   |

3

**Tanytarsus p: Thienemanni Profundal Littoral and Stream**

|   |   |    |     |
|---|---|----|-----|
|   |   | 3  | 10  |
| 1 | 2 | 4  | 10  |
| 3 | 2 | 2  | 19  |
|   |   | 24 | 3   |
| 1 |   | 20 | 1   |
| 4 |   | 50 | -38 |
|   |   | 3  | 7   |
| 1 |   | 3  | 12  |
| 1 |   | 3  | 5   |
|   |   | 4  | 2   |
|   |   | 8  | -2  |
|   |   | 8  | 7   |
